# Supplementary material
Source: Springer Nature journal article supplement (https://www.springermedizin.de/resource/supplementary/13256_2007_346_MOESM3_ESM.pdf/9645778)
Supplement: MOESM3 [file 9645778]

### *Learning points*

- Testing for G6PD deficiency should be considered in children and adults (especially males of African, Mediterranean, or Asian descent) when a diagnosis of diabetes is made
- In a G6PD-deficient diabetic patient, haemolysis may occur as a result hypoglycaemia, blood glucose normalization, ketoacidosis, glibenclamide, metformin
- Methaemoglobinaemia can be used to aid diagnosis of G6PD-deficiency
- There may be an increased incidence of diabetes in G6PD deficient individuals
- Rhabdomyolysis can occur especially in the presence of very high glucose and low phosphate levels and high plasma osmolality
- Serum creatine kinase level can be used to detect rhabdomyolysis
